# Supplementary material
Source: PubMed Central journal article supplement (PMC3438349)
Supplement: NIHMS402029-supplement-aan_het_rot_et_al_2012_SUPPL.pdf [file NIHMS402029-supplement-aan_het_rot_et_al_2012_SUPPL.pdf]

## Ketamine for Depression: Where Do We Go from Here?

### *Supplemental Information*

**Table S1.** Antidepressant responses to ketamine and saline at 72h post-infusion: risk reduction data for the five controlled trials in MDD and BD conducted to date.

|                                          | <b>Diagnosis</b> | <b>N</b> | <b>Ketamine response rate<br/>at 72 h post-infusion<br/>(n responders, n non-responders)</b> | <b>Saline response rate<br/>at 72 h post-infusion<br/>(n responders, n non-responders)</b> | <b>ARR<br/>(95% CI)</b> | <b>NNT<br/>(95% CI)</b> |
|------------------------------------------|------------------|----------|----------------------------------------------------------------------------------------------|--------------------------------------------------------------------------------------------|-------------------------|-------------------------|
| Berman <i>et al.</i><br>(2000) (1)       | MDD              | 8        | 0.50<br>(4, 4)                                                                               | 0.13<br>(1, 7)                                                                             | 38%<br>(-4-79%)         | 3<br>(1-∞)              |
| Zarate <i>et al.</i><br>(2006) (2)       | MDD              | 17       | 0.35<br>(6, 11)                                                                              | 0.14<br>(2, 12)                                                                            | 21%<br>(-8-50%)         | 5<br>(2-∞)              |
| Valentine <i>et al.</i><br>(2011) (3)    | MDD              | 10       | 0.30<br>(3, 7)                                                                               | 0.10<br>(1, 9)                                                                             | 20%<br>(-14-54%)        | 5<br>(2-∞)              |
| DiazGranados <i>et al.</i><br>(2010) (4) | BD               | 17       | 0.24<br>(4, 13)                                                                              | 0.00<br>(0, 16)                                                                            | 24%<br>(2-45%)          | 4<br>(2-51)             |
| Zarate <i>et al.</i><br>(2012) (5)       | BD               | 14       | 0.14<br>(2, 12)                                                                              | 0.00<br>(0, 12)                                                                            | 14%<br>(-7-36%)         | 7<br>(3-∞)              |

ARR, absolute risk reduction; BD, bipolar disorder; CI, confidence interval; MDD, major depressive disorder; NNT, number needed to treat.

N represents the numbers of patients who received ketamine and/or placebo. Responders were patients who had a >50% reduction in scores on at least one depression measure at 72 h post-infusion.

## Supplemental References

1. Berman RM, Cappiello A, Anand A, Oren DA, Heninger GR, Charney DS, *et al.* (2000): Antidepressant effects of ketamine in depressed patients. *Biol Psychiatry* 47:351-354.
2. Zarate CA, Jr., Singh JB, Carlson PJ, Brutsche NE, Ameli R, Luckenbaugh DA, *et al.* (2006): A randomized trial of an N-methyl-D-aspartate antagonist in treatment-resistant major depression. *Arch Gen Psychiatry* 63:856-864.
3. Valentine GW, Mason GF, Gomez R, Fasula M, Watzl J, Pittman B, *et al.* (2011): The antidepressant effect of ketamine is not associated with changes in occipital amino acid neurotransmitter content as measured by [(1)H]-MRS. *Psychiatry Res Neuroimaging* 191:122-127.
4. DiazGranados N, Ibrahim L, Brutsche NE, Newberg A, Kronstein P, Khalife S, *et al.* (2010): A randomized add-on trial of an N-methyl-D-aspartate antagonist in treatment-resistant bipolar depression. *Arch Gen Psychiatry* 67:793-802.
5. Zarate CA, Brutsche NE, Ibrahim L, Franco-Chaves J, DiazGranados N, Cravchik A, *et al.* (2012): Replication of ketamine's antidepressant efficacy in bipolar depression: A randomized controlled add-on trial. *Biol Psychiatry* in press.
